# Supplementary material for: First-principles thermodynamic calculations and experimental investigation of Sr–Si–N–O system—synthesis of Sr2Si5N8:Eu phosphor
Source: Royal Society of Chemistry journal article supplement (doi:10.1039/c2tc00223j), 2012-10-25
Supplement: c2tc00223j.pdf [file c2tc00223j.pdf]

## Supplementary Information

### First-principles Thermodynamic Calculations and Experimental Investigation of Sr–Si–N–O System—Synthesis of $\text{Sr}_2\text{Si}_5\text{N}_8:\text{Eu}$ Phosphor

*Yongseon Kim<sup>1</sup>, Jaecheol Kim<sup>2</sup> and Shinhoo Kang<sup>2,\*</sup>*

<sup>1</sup>Department of Materials Science and Engineering,  
Inha University, Incheon, 402-751, Korea

<sup>2</sup>Department of Materials Science and Engineering,  
Seoul National University, Seoul, 151-742, Korea

Author E-mail: [ys.kim@inha.ac.kr](mailto:ys.kim@inha.ac.kr)  
[cheol@snu.ac.kr](mailto:cheol@snu.ac.kr)  
[shinkang@snu.ac.kr](mailto:shinkang@snu.ac.kr)

S1. Crystal structure and energy (eV/formula unit) of Sr–Si–N–O system compounds obtained by density functional theory calculation: the energy was used for simulation of phase diagrams.

| Compounds                                      | Space group                    | Energy (eV/fu) | Compounds                                       | Space group                    | Energy   |
|------------------------------------------------|--------------------------------|----------------|-------------------------------------------------|--------------------------------|----------|
| Sr <sub>5</sub> Si <sub>3</sub>                | <i>I 4/mcm</i>                 | -27.771        | S <sub>2</sub> N <sub>2</sub> O                 | <i>I 4<sub>1</sub>/amd</i>     | -39.705  |
| SrSi                                           | <i>Cmcm</i>                    | -8.096         | SiO <sub>2</sub>                                | <i>P 6<sub>3</sub>/mmc</i>     | -23.691  |
| SrSi                                           | <i>Immm</i>                    | -7.919         | SiO <sub>2</sub>                                | <i>P6<sub>2</sub>22</i>        | -23.701  |
| SrSi <sub>2</sub>                              | <i>I 4<sub>1</sub>/amd</i>     | -13.820        | SiO <sub>2</sub>                                | <i>P 3<sub>1</sub>21</i>       | -23.704  |
| SrSi <sub>2</sub>                              | <i>P 4<sub>3</sub>32</i>       | -13.579        | SrO <sub>2</sub>                                | <i>I 4/mmm</i>                 | -17.235  |
| Sr <sub>4</sub> Si <sub>7</sub>                | <i>I 4<sub>1</sub>/amd</i>     | -48.319        | SrO                                             | <i>Fm<math>\bar{3}</math>m</i> | -12.093  |
| Sr <sub>2</sub> Si <sub>3</sub>                | <i>I 4<sub>1</sub>/amd</i>     | -20.991        | SrSiO <sub>3</sub>                              | <i>P<math>\bar{1}</math></i>   | -37.000  |
| SrN                                            | <i>C 2/m</i>                   | -11.067        | SrSiO <sub>3</sub>                              | <i>P 2<sub>1</sub>/c</i>       | -36.913  |
| SrN <sub>2</sub>                               | <i>I 4/mmm</i>                 | -19.836        | SrSiO <sub>3</sub>                              | <i>C 2/c</i>                   | -37.094  |
| Sr <sub>2</sub> N                              | <i>R<math>\bar{3}</math>m</i>  | -13.339        | Sr <sub>2</sub> SiO <sub>4</sub>                | <i>Pmnb</i>                    | -49.729  |
| SrN <sub>6</sub>                               | <i>Fddd</i>                    | -52.992        | Sr <sub>3</sub> SiO                             | <i>Pbnm</i>                    | -22.066  |
| Sr <sub>3</sub> N <sub>2</sub>                 | <i>Ia<math>\bar{3}</math></i>  | -24.256        | SrN <sub>2</sub> O <sub>6</sub>                 | <i>Pa<math>\bar{3}</math></i>  | -57.976  |
| Si <sub>3</sub> N <sub>4</sub>                 | <i>I<math>\bar{4}</math>3d</i> | -56.569        | SrSi <sub>2</sub> O <sub>5</sub>                | <i>Cmca</i>                    | -59.567  |
| Si <sub>3</sub> N <sub>4</sub>                 | <i>P 31c</i>                   | -57.267        | SrSi <sub>2</sub> N <sub>2</sub> O <sub>2</sub> | <i>P 1</i>                     | -52.326  |
| Si <sub>3</sub> N <sub>4</sub>                 | <i>Fd<math>\bar{3}</math>m</i> | -56.235        | Sr <sub>3</sub> SiO <sub>5</sub>                | <i>P 4/ncc</i>                 | -61.837  |
| SrSiN <sub>2</sub>                             | <i>P 2<sub>1</sub>/c</i>       | -28.488        | SrSi <sub>6</sub> N <sub>8</sub> O              | <i>Imn2</i>                    | -126.871 |
| SrSi <sub>6</sub> N <sub>8</sub>               | <i>Imm2</i>                    | -117.585       |                                                 |                                |          |
| Sr <sub>2</sub> Si <sub>5</sub> N <sub>8</sub> | <i>Pmn2<sub>1</sub></i>        | -114.978       | Sr                                              | <i>Fm<math>\bar{3}</math>m</i> | -1.682   |
| SrSi <sub>7</sub> N <sub>10</sub>              | <i>Pc</i>                      | -143.193       | Si                                              | <i>Fd<math>\bar{3}</math>m</i> | -5.425   |

S2. DFT calculation results of energy of Eu-doped compounds: doping amount of Eu, energy of Eu-doped compounds, and energy change of each compound with Eu-doping relative to those of the undoped.

|                                                      | Eu/(Eu+Sr)    | E (eV/fu) | $(E-E_{\text{undoped}})/E_{\text{undoped}}$ |
|------------------------------------------------------|---------------|-----------|---------------------------------------------|
| SrSi                                                 | 1/16 (6.25 %) | -8.103    | -0.093 %                                    |
| SrSi <sub>2</sub>                                    | 1/16 (6.25 %) | -13.684   | +0.983 %                                    |
| SrSiO <sub>3</sub> (Sr1)                             | 1/12 (8.33 %) | -37.172   | -0.212 %                                    |
| SrSiO <sub>3</sub> (Sr2)                             | 1/12 (8.33 %) | -37.171   | -0.208 %                                    |
| Sr <sub>2</sub> SiO <sub>4</sub> (Sr1)               | 1/16 (6.25 %) | -49.850   | -0.242 %                                    |
| Sr <sub>2</sub> SiO <sub>4</sub> (Sr2)               | 1/16 (6.25 %) | -49.873   | -0.288 %                                    |
| SrSiN <sub>2</sub>                                   | 1/16 (6.25 %) | -28.545   | -0.203 %                                    |
| SrO                                                  | 1/32 (3.13 %) | -12.131   | -0.312 %                                    |
| Sr <sub>2</sub> Si <sub>5</sub> N <sub>8</sub> (Sr1) | 1/8 (12.5 %)  | -115.212  | -0.203 %                                    |
| Sr <sub>2</sub> Si <sub>5</sub> N <sub>8</sub> (Sr2) | 1/8 (12.5 %)  | -115.208  | -0.200 %                                    |
| SrSi <sub>6</sub> N <sub>8</sub> (Sr1)               | 1/4 (25.0 %)  | -117.732  | -0.125 %                                    |
| SrSi <sub>6</sub> N <sub>8</sub> (Sr2)               | 1/8 (12.5 %)  | -117.657  | -0.061 %                                    |

S3. Change of phase diagrams with different energy values of  $\text{SrSi}_2\text{N}_2\text{O}_2$ : (a) It is assumed that Sr atoms are not dispersed over different sites but occupies only one type of crystallographic site. This is a simplification for DFT calculation, but it was reported that Sr occupies two sites (with 80:20 ratio). The dispersion may appear because it is energetically more favorable. If we assume actual energy of  $\text{SrSi}_2\text{N}_2\text{O}_2$  is about 92% of the calculated energy and simulate phase diagram using this value,  $\text{SrSi}_2\text{N}_2\text{O}_2$  appeared as a thermodynamic stable phase, as shown in (b). (both of the diagrams are simulated at 1500K under HRN condition.)

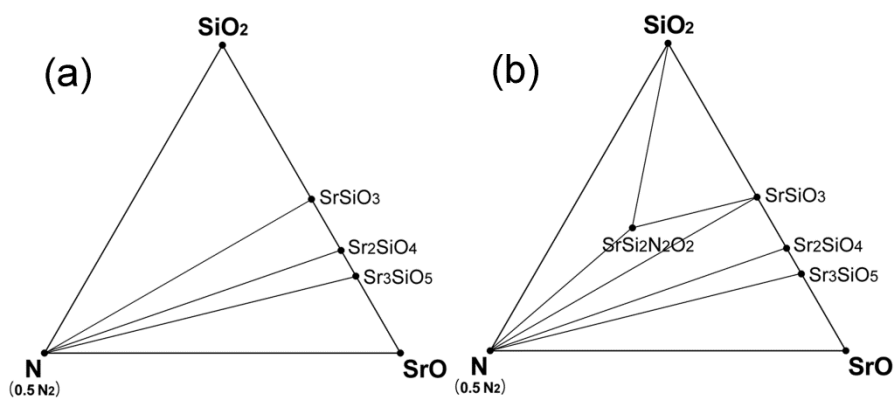

S4. Chemical potential of oxygen: the 0 K chemical potential was determined from combination of formation enthalpies of various metal oxides and DFT-calculated energies, as discussed in the manuscript. The effects of temperature and pressure were reflected based on the data in JANAF thermochemical tables using the following equation:

$$\mu_{\text{O}_2}(T,P) = H^{\circ}(T) - TS^{\circ}(T) + k_{\text{B}}T \ln \frac{P}{P^{\circ}}$$

We present chemical potential of oxygen at  $p_{\text{O}_2} = 0.1$  MPa and 0.02MPa in the following table as an example.

| T (K) | $\mu_{\text{O}_2}$ (eV)    |                             |
|-------|----------------------------|-----------------------------|
|       | $p_{\text{O}_2} = 0.1$ MPa | $p_{\text{O}_2} = 0.02$ MPa |
| 0     | -8.450                     | -8.450                      |
| 100   | -8.585                     | -8.599                      |
| 200   | -8.763                     | -8.790                      |
| 298   | -8.952                     | -8.993                      |
| 300   | -8.956                     | -8.997                      |
| 400   | -9.158                     | -9.214                      |
| 500   | -9.368                     | -9.437                      |
| 600   | -9.583                     | -9.666                      |
| 700   | -9.803                     | -9.900                      |
| 800   | -10.028                    | -10.138                     |
| 900   | -10.256                    | -10.381                     |
| 1000  | -10.488                    | -10.627                     |
| 1100  | -10.724                    | -10.877                     |
| 1200  | -10.963                    | -11.130                     |
| 1300  | -11.205                    | -11.386                     |
| 1400  | -11.450                    | -11.644                     |
| 1500  | -11.698                    | -11.906                     |
| 1600  | -11.948                    | -12.170                     |
| 1700  | -12.200                    | -12.436                     |
| 1800  | -12.455                    | -12.704                     |
| 1900  | -12.711                    | -12.975                     |
| 2000  | -12.970                    | -13.247                     |

S5. Chemical potential of nitrogen gas, which is calculated in the same manner with that of oxygen shown in S4.

| T (K) | $\mu_{\text{N}_2}$ (eV)    |                             |
|-------|----------------------------|-----------------------------|
|       | $p_{\text{N}_2} = 0.1$ MPa | $p_{\text{N}_2} = 0.08$ MPa |
| 0     | -16.050                    | -16.050                     |
| 100   | -16.186                    | -16.187                     |
| 200   | -16.363                    | -16.366                     |
| 298   | -16.552                    | -16.557                     |
| 300   | -16.556                    | -16.561                     |
| 400   | -16.759                    | -16.767                     |
| 500   | -16.970                    | -16.979                     |
| 600   | -17.187                    | -17.198                     |
| 700   | -17.409                    | -17.422                     |
| 800   | -17.636                    | -17.651                     |
| 900   | -17.867                    | -17.884                     |
| 1000  | -18.101                    | -18.121                     |
| 1100  | -18.340                    | -18.361                     |
| 1200  | -18.581                    | -18.604                     |
| 1300  | -18.825                    | -18.850                     |
| 1400  | -19.072                    | -19.098                     |
| 1500  | -19.321                    | -19.350                     |
| 1600  | -19.573                    | -19.603                     |
| 1700  | -19.827                    | -19.859                     |
| 1800  | -20.083                    | -20.117                     |
| 1900  | -20.341                    | -20.378                     |
| 2000  | -20.601                    | -20.640                     |
